# Supplementary material for: Quality of life of Japanese women with dysmenorrhea and/or heavy menstrual bleeding treated with levonorgestrel intrauterine delivery system in a real-world setting
Source: Research Square preprint supplement (doi:10.21203/rs.3.rs-842152/v1), 2022-04-05
Supplement: Supplementary file 1 [file 25bce7762887a0a41bdf0970.xlsx]

## Sheet: Online Resource 1
					Before insertion of LNG-IUS					3 months after insertion of LNG-IUS					12 months after insertion of LNG-IUS					Comparison of median values before and after insertiona
					N	Mean	SD	Median	Q1 - Q3	N	Mean	SD	Median	Q1 - Q3	N	Mean	SD	Median	Q1 - Q3	vs 3 months p-value	vs 12 months p-value
MDQ	During the premenstrual period
		Total score			108	35.8	31.2	25.5	13.0-46.5	95	23.9	22.7	16.0	7.0-32.0	83	18.0	20.4	10.0	4.0-24.0	< 0.0001	< 0.0001
			Pain		110	8.4	4.9	8.0	4.0-12.0	96	6.1	4.8	5.5	2.0-10.0	85	4.8	4.4	4.0	1.0-8.0	< 0.0001	< 0.0001
			Concentration		111	4.8	6.3	2.0	0.0-8.0	96	3.4	4.7	1.0	0.0-5.0	85	2.3	4.2	0.0	0.0-2.0	0.0274	< 0.0001
			Behavioral effect		112	5.0	4.6	4.0	1.0-8.5	97	3.4	4.1	2.0	0.0-6.0	84	2.5	3.6	1.0	0.0-3.5	< 0.0001	< 0.0001
			Autonomic response		112	2.4	3.2	1.0	0.0-3.0	97	1.4	2.2	0.0	0.0-2.0	85	0.9	1.6	0.0	0.0-1.0	< 0.0001	< 0.0001
			Water retention		111	5.1	3.2	5.0	2.0-7.0	95	4.2	3.2	4.0	2.0-6.0	85	3.4	3.0	3.0	1.0-5.0	0.0022	< 0.0001
			Negative affect		111	6.2	6.7	4.0	1.0-9.0	96	3.4	4.6	2.0	0.0-5.0	85	2.5	4.2	1.0	0.0-3.0	< 0.0001	< 0.0001
			Arousal		110	1.6	3.0	0.0	0.0-2.0	96	0.9	1.9	0.0	0.0-1.0	83	0.6	1.3	0.0	0.0-0.0	0.0313	0.0009
			Control		111	2.0	4.0	0.0	0.0-2.0	96	1.4	2.6	0.0	0.0-2.0	85	0.8	1.8	0.0	0.0-0.0	0.1477	< 0.0001
	During the menstrual period
		Total score			109	41.1	29.3	36.0	19.0-56.0	95	23.7	22.8	16.0	7.0-37.0	82	17.1	18.9	10.0	3.0-24.0	< 0.0001	< 0.0001
			Pain		111	10.3	4.6	10.0	7.0-14.0	96	6.7	4.7	7.0	2.5-10.0	84	5.0	4.3	4.0	1.0-9.0	< 0.0001	< 0.0001
			Concentration		111	6.1	6.5	4.0	0.0-10.0	96	3.5	4.7	2.0	0.0-5.5	84	2.4	3.8	0.0	0.0-4.0	< 0.0001	< 0.0001
			Behavioral effect		113	7.2	4.7	7.0	4.0-11.0	98	3.9	4.1	3.0	0.0-7.0	83	2.6	3.6	1.0	0.0-4.0	< 0.0001	< 0.0001
			Autonomic response		112	3.1	3.4	2.0	0.0-5.0	97	1.4	2.2	0.0	0.0-2.0	84	0.9	1.6	0.0	0.0-2.0	< 0.0001	< 0.0001
			Water retention		111	3.9	3.0	4.0	2.0-6.0	95	3.1	3.0	2.0	1.0-5.0	84	2.7	2.7	2.0	1.0-4.0	0.0185	0.0002
			Negative affect		111	6.3	5.9	4.0	2.0-10.0	96	3.1	4.2	1.0	0.0-5.0	84	2.1	3.5	1.0	0.0-2.5	< 0.0001	< 0.0001
			Arousal		110	1.4	2.6	0.0	0.0-2.0	96	1.0	1.9	0.0	0.0-1.0	82	0.5	1.3	0.0	0.0-0.0	0.3512	0.0051
			Control		111	2.3	3.9	0.0	0.0-3.0	96	1.4	2.9	0.0	0.0-2.0	84	0.7	1.7	0.0	0.0-0.0	0.0043	< 0.0001
MMAS	During the menstrual period
		Total score			186	50.1	22.8	47.7	37.4-63.0	153	82.7	19.1	89.3	69.3-100.0	135	88.3	14.6	93.9	79.0-100.0	< 0.0001	< 0.0001
			Practical difficulties		188	4.8	4.7	3.1	0.0-9.4	159	11.2	4.1	14.0	9.4-14.0	149	12.5	3.1	14.0	14.0-14.0	< 0.0001	< 0.0001
			Effects on social life		186	6.3	2.7	6.7	6.7-6.7	159	9.1	2.0	10.0	10.0-10.0	149	9.6	1.2	10.0	10.0-10.0	< 0.0001	< 0.0001
			Psychological effects		187	8.0	3.8	8.4	2.9-8.4	159	11.8	3.1	14.0	8.4-14.0	148	12.5	2.8	14.0	14.0-14.0	< 0.0001	< 0.0001
			Physical health		187	6.4	6.1	4.2	4.2-4.2	159	14.3	7.0	14.9	4.2-21.0	147	15.8	6.5	21.0	14.9-21.0	< 0.0001	< 0.0001
			Interruption of work		187	9.3	5.3	11.3	4.1-11.3	159	15.7	3.8	18.0	11.3-18.0	146	16.7	2.9	18.0	18.0-18.0	< 0.0001	< 0.0001
			Family life		187	15.6	6.4	14.0	14.0-23.0	159	20.9	4.1	23.0	23.0-23.0	147	21.7	3.2	23.0	23.0-23.0	< 0.0001	< 0.0001
aWilcoxon signed-rank test vs baseline median value
																				p
